# Supplementary material
Source: Royal Society of Chemistry journal article supplement (doi:10.1039/d5cp04820f)
Supplement: d5cp04820f1.pdf [file d5cp04820f1.pdf]

Supporting Information

**Investigation of the solution-phase structure  
of macrocyclic anti-leukemia drug  
midostaurin**

*Zeyan Jiang, Qi Wang, Hongyu Xu, Yang Lv, Yue Lei, Yingxue Jin\*, Yimeng Sun\*,  
Zhiqiang Wang\**

Key Laboratory for Photonic and Electronic Bandgap Materials, Ministry of Education,  
College of Chemistry & Chemical Engineering, Harbin Normal University, Harbin,  
150025, China.

AUTHOR INFORMATION

Corresponding Author

\*wangzq@hrbnu.edu.cn (Z Wang), sunyimeng.1@163.com (Y Sun),  
jyxprof@163.com (Y Jin).

| <b>No.</b> | <b>content</b>                                                                                                                                                        | <b>Page<br/>number</b> |
|------------|-----------------------------------------------------------------------------------------------------------------------------------------------------------------------|------------------------|
| 1          | <b>Experimental section.</b>                                                                                                                                          | <b>S4</b>              |
| 2          | <b>Calculation details-</b>                                                                                                                                           | <b>S4</b>              |
| 3          | <b>Molecular dynamics simulation</b>                                                                                                                                  | <b>S5</b>              |
| 4          | <b>Table S1.</b> Relative Gibbs free energies and the Boltzmann weighting factors of the four structures in three different solvents.                                 | <b>S5</b>              |
| 5          | <b>Table S2.</b> Comparison of experimental and theoretical ECD of midostaurin calculated at TD-DFT-CAM-B3LYP/cc-pVDZ level.                                          | <b>S5</b>              |
| 6          | <b>Table S3.</b> Comparison of the experimental peaks and theoretical ECD of the midostaurin-trifluoroethanol composition calculated at the CAM-B3LYP/cc-pVDZ level.  | <b>S6</b>              |
| 7          | <b>Table S4.</b> Comparison of the experimental peaks and theoretical ECD of the midostaurin-acetonitrile composition calculated at the CAM-B3LYP/cc-pVDZ level.      | <b>S6</b>              |
| 8          | <b>Table S5.</b> Comparison of the experimental peaks and theoretical peaks of the ECD of midostaurin-methanol composition calculated at the CAM-B3LYP/cc-pVDZ level. | <b>S6</b>              |
| 9          | <b>Table S6.</b> The minimum surface electrostatic potential of midostaurin.                                                                                          | <b>S6</b>              |
| 10         | <b>Table S7.</b> The maximum surface electrostatic potential of midostaurin.                                                                                          | <b>S7</b>              |
| 11         | <b>Figure S1.</b> Structural diagrams of three-solvent molecular compositions and five-solvent molecular compositions.                                                | <b>S7</b>              |
| 12         | <b>Figure S2.</b> Coordinate graph of the extreme points of the electrostatic potential of single midostaurin.                                                        | <b>S8</b>              |
| 13         | <b>Table S8.</b> The minimum surface electrostatic potential of midostaurin--methanol composition.                                                                    | <b>S9</b>              |
| 14         | <b>Table S9.</b> The maximum surface electrostatic potential of midostaurin--methanol composition.                                                                    | <b>S8</b>              |
| 15         | <b>Figure S3.</b> Coordinate graph of the extreme electrostatic potential points of the midostaurin-methanol composition.                                             | <b>S9</b>              |
| 16         | <b>Table S10.</b> The minimum surface electrostatic potential of midostaurin-trifluoroethanol composition.                                                            | <b>S10</b>             |
| 17         | <b>Table S11.</b> The maximum surface electrostatic potential of midostaurin-trifluoroethanol composition.                                                            | <b>S10</b>             |
| 18         | <b>Figure S4.</b> Coordinate graph of the electrostatic potential extreme points of midostaurin-TFE composition.                                                      | <b>S11</b>             |
| 19         | <b>Table S12.</b> The minimum surface electrostatic potential of midostaurin-ACN composition.                                                                         | <b>S11</b>             |
| 20         | <b>Table S13.</b> The maximum surface electrostatic potential of midostaurin-ACN composition.                                                                         | <b>S12</b>             |
| 21         | <b>Figure S5.</b> The extreme electrostatic potential points of the midostaurin-ACN                                                                                   | <b>S13</b>             |

|    |                                                                                                                                                                                                                                                                                                               |            |
|----|---------------------------------------------------------------------------------------------------------------------------------------------------------------------------------------------------------------------------------------------------------------------------------------------------------------|------------|
|    | composition.                                                                                                                                                                                                                                                                                                  |            |
| 22 | <b>Figure S6.</b> The energy difference of the frontier molecular orbitals of midostaurin-solvent compositions.                                                                                                                                                                                               | <b>S13</b> |
| 23 | Elucidation of the origin of the Cotton effects (CEs) in the experimental ECD spectrum of midostaurin in TFE.<br><b>Figure S7.</b> Molecular orbitals involved in the electronic transitions of midostaurin-TFE cluster.                                                                                      | <b>S14</b> |
| 24 | Elucidation of the origin of the Cotton effects (CEs) in the experimental ECD spectrum of midostaurin in ACN.<br><b>Figure S8.</b> Molecular orbitals involved in the transitions of midostaurin-ACN cluster.                                                                                                 | <b>S14</b> |
| 25 | Elucidation of the origin of the Cotton effects (CEs) in the experimental ECD spectrum of midostaurin in MeOH.<br><b>Figure S9.</b> Molecular orbitals involved in the electronic transitions of midostaurin-MeOH cluster                                                                                     | <b>S15</b> |
| 26 | <b>Figure S10.</b> The two-dimensional molecular docking of midostaurin with the FIT3 protein in acute myeloid leukemia.                                                                                                                                                                                      | <b>S16</b> |
| 27 | <b>Figure S11.</b> The three-dimensional molecular docking of midostaurin with the FIT3 protein in acute myeloid leukemia.                                                                                                                                                                                    | <b>S17</b> |
| 28 | <b>Figure S12.</b> (A) Quantitative electrostatic potential distribution of TFE. (B) Quantitative electrostatic potential distribution of ME. (C) Quantitative electrostatic potential distribution of ACN.                                                                                                   | <b>S17</b> |
| 29 | <b>Table S14.</b> Comparison between the experimental ECD and the theoretical ECD and the similarity. The Specdis software was used for analysis. Under a relatively narrow bandwidth of 0.15 eV, the calculated spectra of solute-solvent compositions were highly consistent with the experimental spectra. | <b>S18</b> |
| 30 | <b>Table S15.</b> The experimental UV-Vis spectra in different solvents.                                                                                                                                                                                                                                      | <b>S19</b> |
| 31 | <b>Figure S13.</b> ECD spectrum recalculated for the single molecule without solvents.                                                                                                                                                                                                                        | <b>S20</b> |

---

## 1.Experimental section.

The compound midostaurin was purchased from Bede Pharmaceutical Technology Co., Ltd. The UV absorption and electronic circular dichroism (ECD) spectra of midostaurin were acquired to obtain reliable structural information in solution. ECD measurements were performed on a JASCO J-1500 CD spectropolarimeter in a series of solvents at a concentration of  $2.0 \times 10^{-5}$  M, using a 5.0-mm path-length quartz cell at ambient temperature. Spectra were collected over the range of 200–400 nm. ECD data are recorded as differential molar absorption coefficients ( $\Delta\epsilon$ ,  $M^{-1}\cdot\text{cm}^{-1}$ ). The simultaneous ultraviolet absorption spectra were recorded to facilitate the interpretation of spectral analysis. The UV absorption spectra were recorded simultaneously and are presented as intensity values in arbitrary units (a.u.) as provided by the instrument.

## 2. Calculation details

After conducting geometry optimization, the circular dichroic spectra of each conformer of midostaurin were simulated using TDDFT/CAM-B3LYP/ cc-PVDZ level. This choice was based on its reported efficiency in accurately predicting electronic excitations, attributed to the CAM methods' 65 % asymptotic fraction of exchange.<sup>1</sup> The ECD spectra of each conformer were then averaged based on Boltzmann distribution theory. The simulated theoretical spectra were finally compared with the experimental spectra.<sup>2</sup> The gentor/genmer component built into molclus was used for structure search to generate a batch of initial structures.<sup>3</sup> Subsequently, Gaussian09 is called through molclus to successively optimize the generated initial structure to ensure the accuracy and stability of the structure.<sup>4</sup> Moreover, through optimization, a molecular configuration closer to the actual existence can be obtained. The optimized structure is clustered and sorted through the isostat component built into molclus. The structure with the lowest energy is screened out from numerous structures, and then the next step of analysis and research is carried out. Additionally, the AutoDock Vina docking software is used for molecular docking of midostaurin with cancer-related proteins.<sup>5</sup> The protein structures utilized for the docking process were obtained from the PDB database (<https://www.rcsb.org/>). Prior to docking, these structures underwent removal of water molecules and ligands using pymol.<sup>6</sup> The protein structure was enriched with polar hydrogen atoms and Coleman charges using Autodock Tool 1.5.6,<sup>7</sup> which were then saved in the.pdbqt file format. Ligand structures were derived from optimized structures at the B3LYP/6–31 G (d,p) level and exported as .pdb files through Multiwfn 3.7 software. Molecular docking simulations were conducted utilizing Autodock Vina 1.1.2, employing parameters based on AutoDockFR 1.2 protocols.<sup>8</sup> The resulting interactions between ligands and receptors were visualized through BIOVIA Discovery Studio Visualizer,<sup>9</sup> enabling comprehensive analysis of both three-dimensional (3D) and two-dimensional (2D) interaction maps.

### Reference

1. M.H. Cardenuto, H.M. Cezar, K.V. Mikkelsen, S.P.A. Sauer b, K. Coutinho and S. Canuto, *Spectrochim Acta. A*. 2021, **251**, 119434.
2. T. Lu, F.W. Chen, *J. Comput. Chem.* 2012, **33**, 580–592.
3. Tian Lu, Molclus program, Version 1.1.2, (accessed August 21, 2024)
4. Gaussian 09 Rev. C.01, Gaussian Inc, Wall-ingford, CT, 2010.

5. M.S. Vald'es-Tresanco, M.E. Vald'es-Tresanc and P.A. Valiente, *Biol. Direct.* 2020, 15, 1–12.
6. Anon. The PyMOL molecular graphics system, version 3.0 Schrödinger, LLC.
7. G.M. Morris, R. Huey, W. Lindstrom, M.F. Sanner, R.K. Belew, D.S. Goodsell and A.J. Olson, *J. Comput. Chem.* 2009, **30**, 2785–2791.
8. A.R. Pradeep, F. Stefano, S.G. David, J.S. Arthur and F.S. Michel, *PLOS Comput. Biol.* 2015, **11**, e1004586.
9. Anon. Discovery Studio Visualizer (version 2019, Dassault Systèmes, San Diego, USA).

### 3. Molecular dynamics simulation

Molecular dynamics simulations were conducted using the GROMACS 2021.4 package. The protein (FLT3) topology was generated with the AMBER ff14SB force field, while the ligand midostaurin was parameterized using GAFF with AM1-BCC charges (via ACPYPE). The protein–ligand complex was solvated in a cubic box with TIP3P water, extending 10 Å beyond all atoms. Na<sup>+</sup> counterions were added for charge neutrality, and additional NaCl was added to a concentration of 0.15 M. Energy minimization was performed using the steepest descent algorithm until the maximum force was <1000 kJ/mol·nm. Equilibration consisted of two steps: (i) NVT ensemble at 300 K for 500 ps using the V-rescale thermostat, followed by (ii) NPT ensemble at 1 bar for 1 ns using the Parrinello–Rahman barostat. Production MD was performed for 250 ns with a 2 fs integration time step, applying the LINCS algorithm to constrain hydrogen bonds. Long-range electrostatics were treated using the particle mesh Ewald (PME) method with a cutoff of 1.0 nm. Trajectories were analyzed for RMSD, RMSF, radius of gyration (Rg), number of hydrogen bonds, and solvent accessible surface area (SASA) using GROMACS utilities. Visualization of MD trajectories and interaction mapping was performed with VMD.

**4. Table S1.** Relative Gibbs free energies and the Boltzmann weighting factors of the four structures in three different solvents.

| ACN   |                             |       | MeOH  |                             |       | TFE   |                             |       |
|-------|-----------------------------|-------|-------|-----------------------------|-------|-------|-----------------------------|-------|
| Conf. | $\Delta G(\text{kcal/mol})$ | P%    | Conf. | $\Delta G(\text{kcal/mol})$ | P%    | Conf. | $\Delta G(\text{kcal/mol})$ | P%    |
| A     | 0.000                       | 0.604 | A     | 0.000                       | 0.601 | A     | 0.000                       | 0.593 |
| C     | 0.647                       | 0.202 | C     | 0.638                       | 0.205 | C     | 0.607                       | 0.213 |
| D     | 1.078                       | 0.098 | D     | 1.070                       | 0.099 | D     | 1.054                       | 0.100 |
| B     | 1.089                       | 0.096 | B     | 1.087                       | 0.096 | B     | 1.086                       | 0.095 |

[a] Theoretical population calculated using the Boltzmann equation and taking T=298.15 K.

**5. Table S2.** Comparison of experimental and theoretical ECD of midostaurin calculated at TD-DFT-CAM-B3LYP/cc-pVDZ level.

| Excited State | Exp(nm) | Calcd(nm) | $\Delta E(\text{eV})$ | f      | MO contribution          |
|---------------|---------|-----------|-----------------------|--------|--------------------------|
| S0-S1         | 314     | 317.9     | 3.9001                | 0.1376 | HOMO150-LOMO151 (85.81%) |
| S0-S3         | 290     | 263.12    | 4.712                 | 1.1545 | HOMO150-MO153 (65.67%)   |
| S0-S5         | 259     | 250.76    | 4.9444                | 0.315  | MO149-MO153(66.71%)      |
| S0-S8         | 246     | 236.76    | 5.2148                | 0.1675 | MO149-MO155(23.58%)      |

|        |     |       |        |        |                       |
|--------|-----|-------|--------|--------|-----------------------|
| S0-S19 | 224 | 202.2 | 6.1317 | 0.1028 | MO142-LUMO151(14.35%) |
|--------|-----|-------|--------|--------|-----------------------|

**6. Table S3.** Comparison of the experimental peaks and theoretical ECD of the midostaurin-trifluoroethanol composition calculated at the CAM-B3LYP/cc-pVDZ level.

| Excited State | Exp(nm) | Calcd(nm) | $\Delta E$ (eV) | f      | MO contribution              |
|---------------|---------|-----------|-----------------|--------|------------------------------|
| S0-S1         | 314     | 312.59    | 3.9663          | 0.1294 | HOMO (250)-LOMO (251) 65.49% |
| S0-S2         | 290     | 291.24    | 4.2571          | 0.2457 | MO (249)-LOMO (251) 70.64%   |
| S0-S3         | 259     | 259.42    | 4.7793          | 1.0313 | HOMO (250)- MO (253) 67.44%  |
| S0-S5         | 246     | 247.39    | 5.0118          | 0.2891 | MO (248)-LOMO (251) 65.26%   |
| S0-S10        | 224     | 220.92    | 5.6123          | 0.2962 | HOMO (250)- MO (255) 60.11%  |

**7. Table S4.** Comparison of the experimental peaks and theoretical ECD of the midostaurin-acetonitrile composition calculated at the CAM-B3LYP/cc-pVDZ level.

| Excited State | Exp(nm) | Calcd(nm) | $\Delta E$ (eV) | f      | MO contribution         |
|---------------|---------|-----------|-----------------|--------|-------------------------|
| S0-S1         | 312     | 311.2     | 3.9864          | 0.1363 | HOMO194-LOMO195(84.52%) |
| S0-S2         | 295     | 287.79    | 4.3082          | 0.194  | MO193-LUMO195(64.41%)   |
| S0-S3         | 262     | 259.48    | 4.7781          | 1.1796 | HOMO194-MO197(60.76)    |
| S0-S5         | 245     | 245.69    | 5.0465          | 0.2767 | MO193-MO197(58.41%)     |
| S0-S8         | 232     | 234.1     | 5.2963          | 0.2146 | MO193-MO199(19.69%)     |
| S0-S10        | 210     | 211.85    | 5.8525          | 0.2814 | HOMO194-MO199(49.59%)   |

**8. Table S5.** Comparison of the experimental peaks and theoretical peaks of the ECD of midostaurin-methanol composition calculated at the CAM-B3LYP/cc-pVDZ level.

| Excited State | Exp(nm) | Calcd(nm) | $\Delta E$ (eV) | f      | MO contribution       |
|---------------|---------|-----------|-----------------|--------|-----------------------|
| S0-S1         | 344     | 349.22    | 3.5503          | 0.0995 | MO185-MO189(92.62%)   |
| S0-S2         | 321     | 320.38    | 3.8699          | 0.0877 | MO185-LOMO187(55.00%) |
| S0-S3         | 304     | 294.43    | 4.2109          | 0.3018 | HOMO186-MO188(82.96%) |
| S0-S5         | 284     | 280.67    | 4.4174          | 0.0772 | MO184-MO187(45.70%)   |
| S0-S10        | 263     | 267.38    | 4.637           | 0.189  | MO183-LOMO187(64.51%) |
| S0-S14        | 242     | 244.63    | 5.0682          | 0.0372 | MO185-MO191(37.46%)   |
| S0-S25        | 223     | 229.89    | 5.3933          | 0.0121 | MO179-MO187(35.05%)   |

**9. Table S6.** The minimum surface electrostatic potential of midostaurin.

|    | a.u.     | eV       | kcal/mol | X/Y/Z coordinate (Angstrom) |          |          |
|----|----------|----------|----------|-----------------------------|----------|----------|
| *1 | 0.08806  | -2.39637 | -55.2616 | 7.19486                     | -2.91686 | 1.923811 |
| 2  | -0.06776 | -1.84373 | -42.5175 | -5.77443                    | 1.392744 | -2.30487 |
| 3  | 0.028677 | 0.780336 | 17.99499 | -3.5959                     | -1.90061 | 3.114459 |
| 4  | -0.04002 | -1.08902 | -25.1134 | 0.650488                    | -0.59588 | 1.332682 |
| 5  | -0.016   | -0.43533 | -10.0389 | 1.311618                    | 4.563603 | 1.729224 |
| 6  | -0.03924 | -1.06776 | -24.6232 | 1.458234                    | 0.04356  | -3.23567 |

|   |           |          |          |          |          |          |
|---|-----------|----------|----------|----------|----------|----------|
| 7 | -0.024    | -0.65304 | -15.0594 | 2.818706 | 4.692577 | -1.79574 |
| 8 | 0.030007  | 0.81652  | 18.82943 | 6.203402 | 3.439851 | 1.762448 |
| 9 | -0.00809- | -0.22005 | -5.07451 | -7.50971 | -2.22046 | 1.516051 |

**10. Table S7.** The maximum surface electrostatic potential of midostaurin.

|    | a.u.     | eV       | kcal/mol | X/Y/Z coordinate (Angstrom) |          |          |
|----|----------|----------|----------|-----------------------------|----------|----------|
| *1 | 0.060837 | 1.655462 | 38.1759  | 7.899111                    | 1.299025 | 2.628062 |
| 2  | 0.032641 | 0.888214 | 20.48273 | -10.2769                    | -0.06593 | 3.113032 |
| 3  | 0.019488 | 0.530289 | 12.22876 | -7.7064                     | -1.76724 | -2.12932 |
| 4  | 0.036136 | 0.983306 | 22.67559 | -6.80267                    | 1.01611  | 4.709779 |
| 5  | 0.031201 | 0.849033 | 19.5792  | -4.84392                    | -2.58029 | 2.648581 |
| 6  | 0.046916 | 1.276658 | 29.44045 | -3.67089                    | 0.855529 | 2.705044 |
| 7  | 0.030536 | 0.830915 | 19.16137 | -3.4552                     | -2.84488 | 2.651064 |
| 8  | 0.03818  | 1.038928 | 23.95826 | -2.60556                    | -3.8189  | 0.051798 |
| 9  | 0.040715 | 1.107924 | 25.54935 | -2.10935                    | 3.902131 | -1.40856 |
| 10 | 0.04041  | 1.099607 | 25.35757 | -1.93345                    | 3.028826 | -0.66932 |
| 11 | 0.031183 | 0.848523 | 19.56743 | -1.43022                    | 2.528107 | 3.195672 |
| 12 | 0.028373 | 0.772065 | 17.80426 | -0.70816                    | 1.0199   | 4.085221 |
| 13 | 0.044139 | 1.201096 | 27.69796 | -0.70336                    | -3.6174  | -2.25841 |
| 14 | 0.028281 | 0.769555 | 17.74639 | -0.53081                    | 7.209489 | -0.8782  |
| 15 | 0.017424 | 0.474119 | 10.93345 | 0.252638                    | 2.913153 | -4.29402 |
| 16 | 0.017414 | 0.473852 | 10.92729 | 1.214714                    | -7.27799 | -1.18636 |
| 17 | 0.026505 | 0.721249 | 16.6324  | 3.127218                    | 7.52018  | 0.755417 |
| 18 | 0.002709 | 0.07371  | 1.699786 | 4.478041                    | -7.14923 | 0.468573 |
| 19 | 0.037837 | 1.029595 | 23.74305 | 5.128203                    | 4.216773 | 1.444686 |
| 20 | 0.029171 | 0.793783 | 18.30509 | -10.3403                    | -1.36336 | -0.39754 |

**11. Figure S1.**

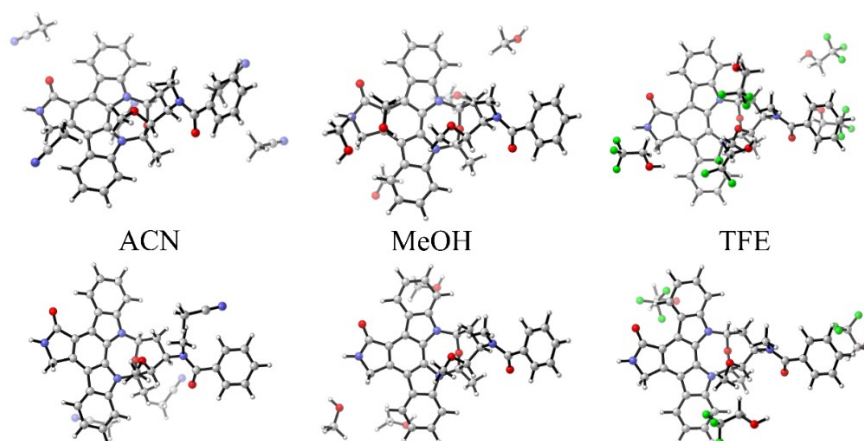

**Figure S1.** Structural diagrams of three-solvent molecular compositions and five-solvent molecular compositions.

Larger or smaller clusters failed to form coherent hydrogen-bond networks under the present

conditions.

## 12. Figure S2.

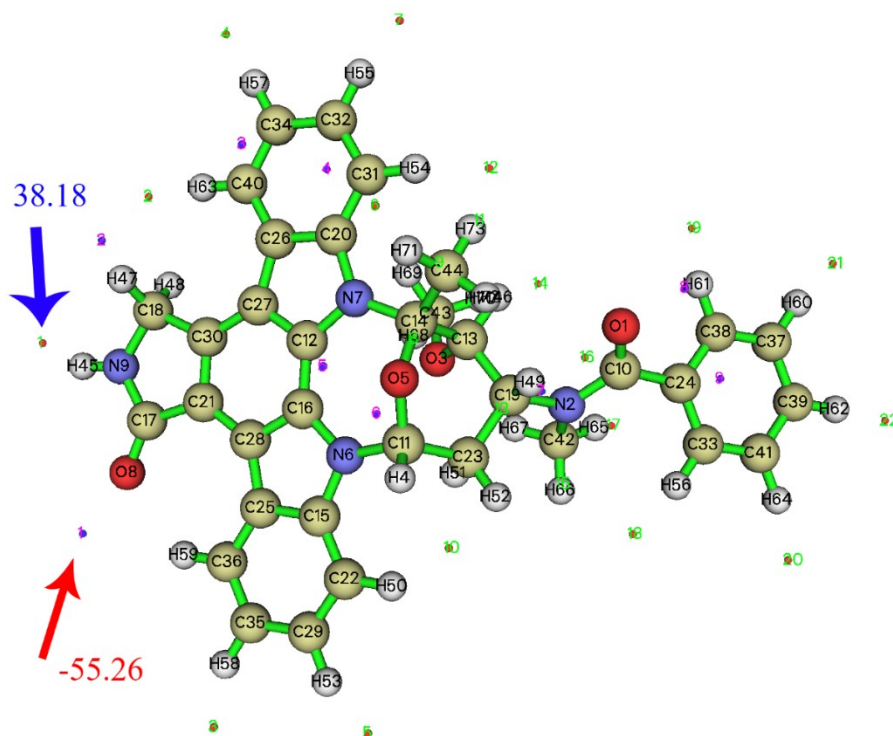

**Figure S2.** Coordinate graph of the extreme points of the electrostatic potential of single midostaurin.

**13. Table S8.** The minimum surface electrostatic potential of midostaurin--methanol composition.

|    | a.u.     | eV       | kc al/mol | X/Y/Z coordinate (Angstrom) |          |          |
|----|----------|----------|-----------|-----------------------------|----------|----------|
| *1 | -0.08518 | -2.31799 | -53.4541  | -7.16251                    | -3.15965 | -2.20114 |
| 2  | -0.05222 | -1.42111 | -32.7716  | -4.22574                    | -4.25483 | 0.961804 |
| 3  | -0.01628 | -0.44296 | -10.2149  | -3.96115                    | 4.4471   | 2.548445 |
| 4  | -0.04104 | -1.1168  | -25.7541  | -3.18329                    | -3.89374 | -2.95345 |
| 5  | -0.00526 | -0.14305 | -3.29887  | -2.43331                    | 5.21135  | -1.07681 |
| 6  | -0.02926 | -0.79619 | -18.3605  | -1.57985                    | -0.1832  | 3.225082 |
| 7  | -0.04622 | -1.25784 | -29.0066  | 0.669151                    | -0.60437 | -4.4261  |
| 8  | -0.06307 | -1.71629 | -39.5787  | 1.867375                    | -5.29892 | 1.305052 |
| 9  | -0.05392 | -1.46717 | -33.8338  | 4.358907                    | -3.21948 | 3.676724 |
| 10 | -0.05298 | -1.4417  | -33.2465  | 5.843351                    | -0.83861 | 1.974532 |
| 11 | 0.00543  | 0.147765 | 3.407554  | 6.357806                    | 0.398117 | -3.85499 |
| 12 | -0.04441 | -1.2084  | -27.8664  | 6.363467                    | 5.11047  | -0.41395 |

**14. Table S9.** The maximum surface electrostatic potential of midostaurin--methanol composition.

|   | a.u.     | eV       | kcal/mol | X/Y/Z coordinate (Angstrom) |          |          |
|---|----------|----------|----------|-----------------------------|----------|----------|
| 1 | 0.061138 | 1.663655 | 38.36483 | -8.49653                    | 1.128124 | -2.28603 |
| 2 | 0.042716 | 1.16236  | 26.80469 | -6.18559                    | 3.936893 | -0.79949 |
| 3 | 0.030546 | 0.831201 | 19.16797 | -4.60221                    | 7.515027 | 0.398294 |

|     |          |          |          |          |          |          |
|-----|----------|----------|----------|----------|----------|----------|
| 4   | -0.00222 | -0.06028 | -1.39016 | -3.85827 | -6.9934  | -1.80148 |
| 5   | 0.015896 | 0.432546 | 9.974753 | -1.47126 | 0.207422 | -2.14978 |
| 6   | 0.002373 | 0.064562 | 1.488829 | -0.94678 | -7.23427 | -0.4239  |
| 7   | 0.00169  | 0.045998 | 1.060746 | -0.94543 | -2.83726 | -5.48434 |
| 8   | 0.04038  | 1.098795 | 25.33884 | -0.65379 | 3.466184 | -2.79664 |
| 9   | 0.007576 | 0.206155 | 4.754044 | -0.34438 | -4.63638 | 5.008725 |
| 10  | 0.01513  | 0.411722 | 9.494537 | 0.022032 | -1.86994 | 3.573592 |
| 11  | 0.005683 | 0.154647 | 3.566242 | 1.449078 | -5.2183  | 5.51303  |
| 12  | 0.068958 | 1.876446 | 43.27192 | 1.564208 | 3.466048 | 0.629799 |
| 13  | 0.019736 | 0.537046 | 12.38458 | 1.59668  | -2.03434 | 6.066272 |
| 14  | 0.037025 | 1.007504 | 23.23362 | 2.636291 | 1.531835 | 3.540119 |
| 15  | 0.031145 | 0.847486 | 19.5435  | 3.384784 | -1.83328 | -1.63851 |
| 16  | 0.02907  | 0.791041 | 18.24185 | 4.011428 | -2.80008 | -2.64405 |
| 17  | 0.032545 | 0.885604 | 20.42253 | 7.14723  | -2.86962 | -4.27379 |
| 18  | 0.029198 | 0.794512 | 18.32191 | 5.429886 | -2.69708 | -3.19434 |
| *19 | 0.074759 | 2.034288 | 46.91185 | 5.285072 | 2.460131 | -2.53683 |
| 20  | 0.031735 | 0.86355  | 19.91395 | 9.336813 | 2.306259 | -1.48674 |
| 21  | 0.034044 | 0.926374 | 21.36272 | 9.709022 | -0.16231 | -3.7227  |

15. Figure S3.

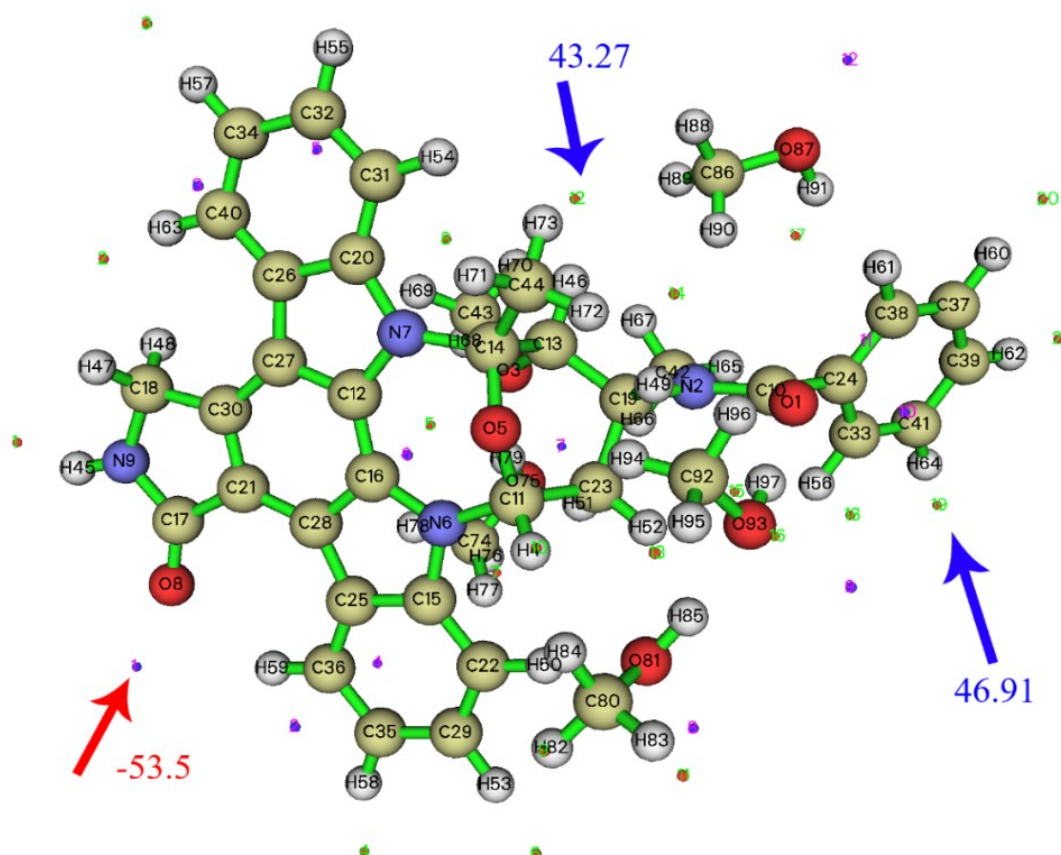

Figure S3. Coordinate graph of the extreme electrostatic potential points of the midostaurin--methanol composition.

**16.Table S10.** The minimum surface electrostatic potential of midostaurin-trifluoroethanol composition.

|     | a.u.     | eV       | kcal/mol | X/Y/Z coordinate (Angstrom) |          |          |
|-----|----------|----------|----------|-----------------------------|----------|----------|
| 1   | 0.005121 | 0.139339 | 3.213242 | -7.42371                    | 1.178578 | -2.35228 |
| 2   | -0.0673  | -1.83139 | -42.2329 | -5.1525                     | -4.24549 | 3.176441 |
| 3   | -0.04615 | -1.25569 | -28.9569 | -4.13818                    | -1.99649 | 2.812861 |
| 4   | -0.01671 | -0.45462 | -10.4839 | -3.01298                    | -5.39112 | -2.38292 |
| 5   | -0.00908 | -0.24718 | -5.70016 | -2.45987                    | -2.95458 | -1.63417 |
| 6   | -0.01606 | -0.43693 | -10.0758 | -0.29768                    | -0.54914 | 3.76293  |
| 7   | -0.05107 | -1.38975 | -32.0483 | -0.01523                    | 1.67882  | -1.42952 |
| 8   | -0.02959 | -0.80512 | -18.5666 | 0.042223                    | -3.45172 | -3.16425 |
| 9   | -0.0433  | -1.17814 | -27.1686 | -0.01981                    | 5.801227 | 0.217561 |
| 10  | -0.03138 | -0.85378 | -19.6887 | 0.341858                    | 4.598307 | -3.75088 |
| 11  | -0.06591 | -1.79338 | -41.3564 | 1.707601                    | 4.486079 | -1.75778 |
| 12  | -0.07293 | -1.98441 | -45.7616 | 2.071021                    | -2.12878 | 4.91773  |
| 13  | -0.04748 | -1.29189 | -29.7918 | 2.685387                    | -4.05846 | -0.17893 |
| 14  | -0.07131 | -1.94031 | -44.7446 | 4.055003                    | 2.893934 | 1.250551 |
| 15  | -0.06973 | -1.89757 | -43.759  | 4.491454                    | 1.59212  | 1.006335 |
| 16  | -0.04769 | -1.29781 | -29.9283 | 4.722233                    | 1.439662 | 4.969043 |
| 17  | -0.04769 | -1.2978  | -29.9281 | 4.981198                    | 1.384357 | 4.836523 |
| *18 | -0.09514 | -2.58895 | -59.7026 | 5.918642                    | 4.350661 | -2.30868 |
| 19  | -0.03042 | -0.82772 | -19.0877 | 6.079252                    | -1.45665 | 2.210435 |

**17.Table S11.** The maximum surface electrostatic potential of midostaurin-trifluoroethanol composition.

|     | a.u.     | eV       | kc al/mol | X/Y/Z coordinate (Angstrom) |          |          |
|-----|----------|----------|-----------|-----------------------------|----------|----------|
| 1   | 0.039993 | 1.088269 | 25.0961   | -10.9491                    | 0.939396 | -1.71991 |
| 2   | 0.044415 | 1.2086   | 27.871    | -9.18142                    | 3.505222 | 1.002072 |
| 3   | 0.039452 | 1.073552 | 24.75672  | -8.64031                    | -2.1445  | -2.84575 |
| 4   | -0.00993 | -0.27015 | -6.22981  | -8.21042                    | -0.52023 | 1.134508 |
| 5   | 0.04268  | 1.16137  | 26.78186  | -6.39251                    | -2.85005 | -1.56168 |
| 6   | 0.026668 | 0.725684 | 16.73469  | -6.20512                    | -6.4561  | 0.104256 |
| 7   | 0.055314 | 1.50517  | 34.71008  | -5.8524                     | 3.160455 | 1.662496 |
| 8   | 0.023274 | 0.633316 | 14.60462  | -4.66977                    | -6.13021 | -0.0534  |
| 9   | 0.037519 | 1.020939 | 23.54344  | -4.39732                    | 0.504885 | -1.24653 |
| 10  | 0.107619 | 2.928455 | 67.53185  | -3.85177                    | 5.99347  | 0.931717 |
| 11  | -0.01021 | -0.27777 | -6.40554  | -3.33582                    | -2.81178 | 1.097993 |
| 12  | 0.040983 | 1.115192 | 25.71695  | -3.06897                    | 3.18412  | 2.868598 |
| *13 | 0.115265 | 3.136511 | 72.32972  | -2.53733                    | -4.09461 | -1.33498 |
| 14  | 0.020232 | 0.550551 | 12.69602  | -1.97971                    | -0.79088 | -3.72346 |
| 15  | 0.009168 | 0.249485 | 5.753271  | -1.84792                    | -2.25278 | -0.93577 |
| 16  | -0.0088  | -0.23947 | -5.52235  | -1.58704                    | -3.5625  | 3.006753 |
| 17  | -0.00167 | -0.04546 | -1.04827  | -1.28909                    | -4.46099 | 1.276303 |
| 18  | 0.035754 | 0.972929 | 22.43629  | -0.91963                    | 3.046495 | 3.291179 |
| 19  | 0.013035 | 0.35469  | 8.179359  | -0.47482                    | -6.89137 | -1.69687 |

|    |          |          |          |          |          |          |
|----|----------|----------|----------|----------|----------|----------|
| 20 | -0.01523 | -0.41455 | -9.55982 | 0.38165  | 3.752964 | -2.76403 |
| 21 | 0.013287 | 0.361562 | 8.337818 | 0.522932 | 7.01439  | 2.877568 |
| 22 | -0.02798 | -0.76126 | -17.5551 | 2.193308 | -2.46316 | 1.190844 |
| 23 | 0.018265 | 0.497008 | 11.46128 | 2.504719 | -6.21356 | -3.73618 |
| 24 | -0.00469 | -0.12755 | -2.94138 | 3.464582 | 7.715134 | 0.773342 |
| 25 | -0.03764 | -1.02417 | -23.618  | 3.745536 | -0.12458 | 0.614832 |
| 26 | 0.025373 | 0.690421 | 15.92151 | 3.953596 | -2.65796 | -3.95114 |
| 27 | -0.00671 | -0.18256 | -4.20994 | 4.559276 | -2.92255 | 3.337221 |
| 28 | -0.03038 | -0.82679 | -19.0663 | 4.548356 | 1.773338 | 3.458595 |
| 29 | -0.04205 | -1.14419 | -26.3856 | 4.957077 | -0.04047 | 5.587142 |
| 30 | -0.00868 | -0.23615 | -5.44574 | 5.166152 | -1.31844 | 3.140992 |
| 31 | 0.057682 | 1.569602 | 36.19591 | 6.475366 | 0.38556  | -4.54712 |
| 32 | 0.007701 | 0.209561 | 4.8326   | 7.292122 | -3.56799 | -3.36533 |

18. Figure S4.

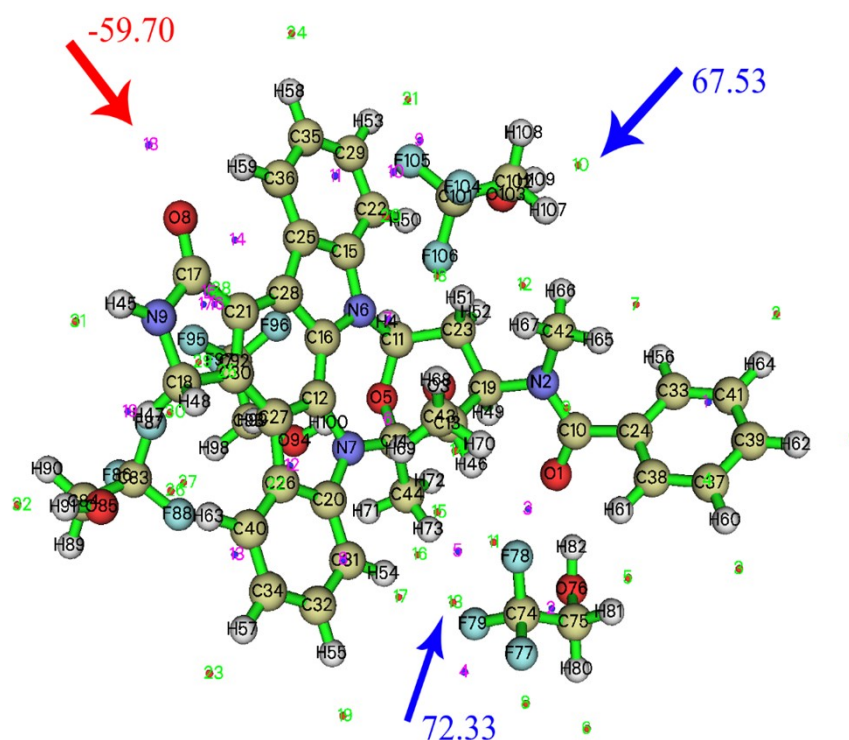

Figure S4. Coordinate graph of the electrostatic potential extreme points of midostaurin-TFE composition.

19. Table S12. The minimum surface electrostatic potential of midostaurin-ACN composition.

|   | a.u.     | eV       | k cal/mol | X/Y/Z coordinate (Angstrom) |          |          |
|---|----------|----------|-----------|-----------------------------|----------|----------|
| 1 | -0.06199 | -1.68676 | -38.8976  | -8.22417                    | -2.93745 | -2.34689 |
| 2 | -0.00499 | -0.13584 | -3.13261  | -5.48263                    | -0.1177  | 3.99149  |
| 3 | -0.00541 | -0.14727 | -3.39622  | -5.021                      | -0.58262 | -1.093   |
| 4 | -0.07482 | -2.03602 | -46.9517  | -3.6662                     | 0.487987 | -4.18822 |
| 5 | -0.07721 | -2.10098 | -48.4498  | -3.70121                    | 0.963293 | -2.33707 |
| 6 | 0.027955 | 0.760707 | 17.54233  | -3.6364                     | -4.6039  | -0.6869  |

|      |          |          |          |          |          |          |
|------|----------|----------|----------|----------|----------|----------|
| 7    | -0.07831 | -2.13099 | -49.1419 | -2.99999 | 2.988943 | -0.58334 |
| 8    | -0.07681 | -2.09006 | -48.1981 | -2.67864 | 3.323063 | -0.36301 |
| 9    | -0.06235 | -1.69663 | -39.1253 | -1.3167  | -5.79453 | 2.161944 |
| 10   | 0.039721 | 1.080855 | 24.92514 | 0.006532 | -0.50271 | 2.691046 |
| 11   | -0.04315 | -1.17421 | -27.0779 | 0.814725 | 0.032812 | -4.06076 |
| 12   | 0.026712 | 0.726858 | 16.76177 | 2.526687 | 6.50611  | 0.568716 |
| 13   | -0.01866 | -0.50773 | -11.7085 | 3.198233 | 4.254538 | -2.87711 |
| 14   | 0.023762 | 0.646606 | 14.91111 | 3.858861 | 5.198329 | 1.522704 |
| 15   | -0.04555 | -1.23941 | -28.5815 | 4.504187 | -4.36644 | -1.8616  |
| * 16 | -0.07872 | -2.14221 | -49.4006 | 7.546956 | -3.59931 | 1.339379 |

**20.Table S13.** The maximum surface electrostatic potential of midostaurin-ACN composition.

|    | a.u.     | eV       | kcal/mol | X/Y/Z coordinate (Angstrom) |          |          |
|----|----------|----------|----------|-----------------------------|----------|----------|
| 1  | 0.032579 | 0.886532 | 20.44392 | -9.09117                    | 0.572395 | 4.134723 |
| 2  | 0.026698 | 0.726479 | 16.75303 | -8.28091                    | 2.058267 | 0.357235 |
| 3  | 0.026628 | 0.724585 | 16.70935 | -8.19607                    | 2.480211 | -2.73298 |
| 4  | 0.030077 | 0.818446 | 18.87384 | -8.06833                    | 1.900606 | 3.76523  |
| *5 | 0.067424 | 1.834698 | 42.30917 | -7.82369                    | -2.81554 | 2.82338  |
| 6  | 0.033005 | 0.898113 | 20.711   | -7.3778                     | 3.506138 | 3.657227 |
| 7  | -0.00186 | -0.0507  | -1.16919 | -4.99327                    | -0.5752  | -0.95329 |
| 8  | 0.041185 | 1.120697 | 25.8439  | -4.07458                    | -2.97942 | 0.830186 |
| 9  | 0.036608 | 0.996167 | 22.97217 | -3.69072                    | -5.13892 | -2.4706  |
| 10 | 0.030349 | 0.825826 | 19.04401 | -2.90008                    | -0.36379 | 3.619233 |
| 11 | 0.037139 | 1.010615 | 23.30536 | -2.37512                    | -3.47766 | -1.83378 |
| 12 | 0.034945 | 0.950894 | 21.92816 | -0.55241                    | -3.42468 | -2.26214 |
| 13 | 0.011455 | 0.311719 | 7.188423 | 0.792361                    | 3.180171 | -4.1645  |
| 14 | 0.065548 | 1.78366  | 41.13222 | 0.771913                    | 3.533715 | 3.949392 |
| 15 | 0.009531 | 0.259339 | 5.980513 | 1.069713                    | -7.38064 | -1.1442  |
| 16 | 0.052414 | 1.426245 | 32.89003 | 1.166124                    | -0.82584 | 4.220142 |
| 17 | 0.052176 | 1.419771 | 32.74072 | 1.323457                    | -0.21661 | 3.607394 |
| 18 | 0.057457 | 1.56349  | 36.05497 | 1.200548                    | 7.170848 | 2.427053 |
| 19 | 0.032927 | 0.895994 | 20.66214 | 1.815416                    | 7.501578 | -1.02652 |
| 20 | -0.01049 | -0.28531 | -6.5795  | 3.380666                    | 1.878525 | -2.46839 |
| 21 | -0.01608 | -0.43745 | -10.0877 | 3.759509                    | 3.627055 | -2.41931 |
| 22 | 0.002824 | 0.076836 | 1.771885 | 4.34739                     | -7.41726 | 0.563652 |
| 23 | 0.038178 | 1.038884 | 23.95727 | 4.806357                    | 7.067895 | 0.33151  |
| 24 | 0.050064 | 1.362317 | 31.4158  | 5.721268                    | 3.10372  | 2.311555 |
| 25 | 0.05158  | 1.403564 | 32.36699 | 6.15482                     | 3.568641 | 1.235848 |
| 26 | 0.026367 | 0.717486 | 16.54562 | 8.72784                     | 0.684894 | 2.023174 |

**21.Figure S5.**

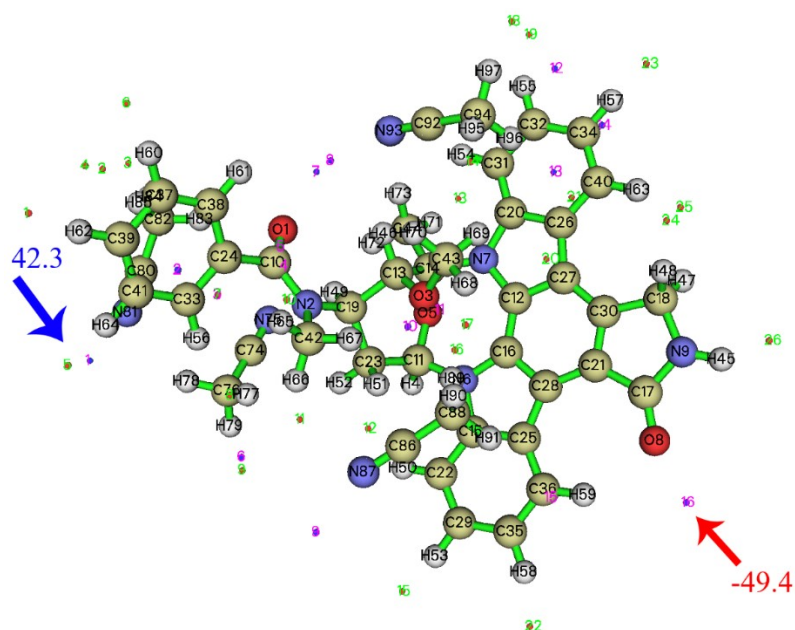

**Figure S5.** The extreme electrostatic potential points of the midostaurin-ACN composition.

**22. Figure S6.**

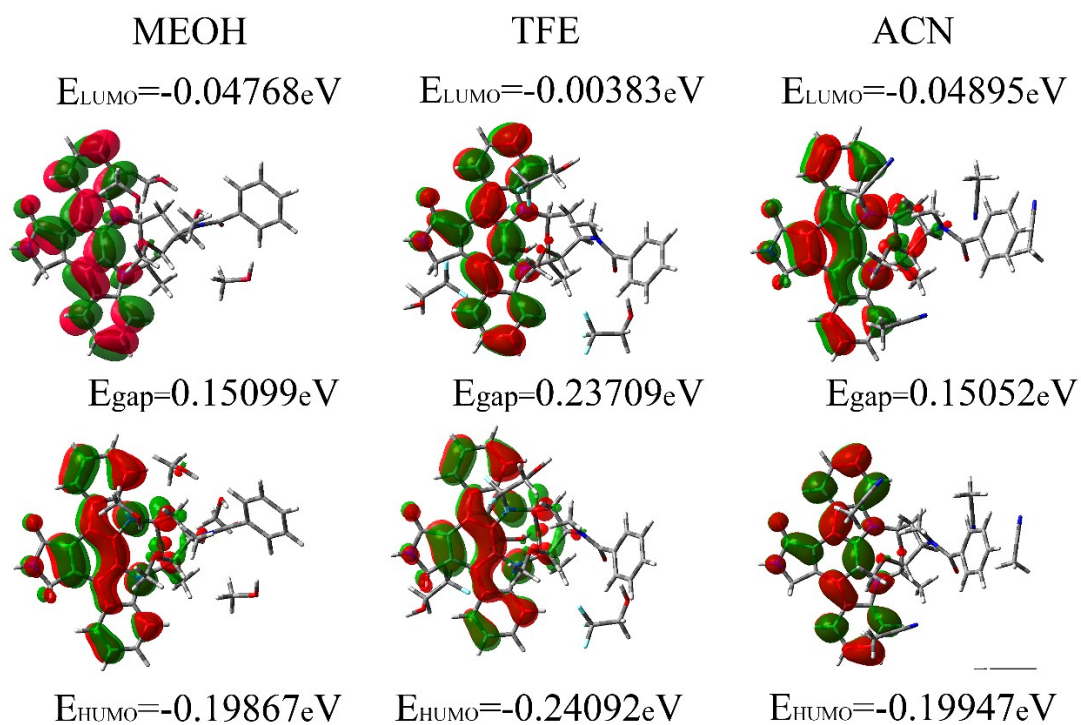

**Figure S6.** The energy difference of the frontier molecular orbitals of midostaurin-solvent compositions.

**23. Elucidation of the origin of the Cotton effects (CEs) in the experimental ECD spectrum of**

### midostaurin.

To elucidate the origin of the Cotton effects (CEs) in the experimental ECD spectrum of midostaurin, a comprehensive molecular orbital (MO) analysis was performed at the TDDFT/CAM-B3LYP/cc-pVDZ level. Here, we mainly focus on the detailed MO analysis in the protonated solvent TFE. In the experimental data, the negative CE observed at 225 nm can be attributed to the  $\pi$ - $\pi^*$  transition from the indolopyrrolocarbazole to indole HOMO 250 $\rightarrow$ MO 255 (60.11%). The positive CE at 259 nm is derived from HOMO 250 $\rightarrow$ MO 253 (67.44%), the n- $\pi^*$  transition from indole-pyrrocarbazole to pyrrocarbazole. The weak positive CE at 246 nm corresponds to the transition from MO 248 to LUMO 251 (65.26%), and the positive CE at 290 nm is caused by the  $\pi$ - $\pi^*$  electron transition from MO249 to LOMO251 (70.64%) of pyrrolidone and indole-pyrrolidone. The positive CE in the experiment at 312 nm is related to the  $\pi$ - $\pi^*$  transition involving HUMO 250 $\rightarrow$ LUMO 251 (85.78%) that occurs between indole-pyrrolidone and pyrrolidone.

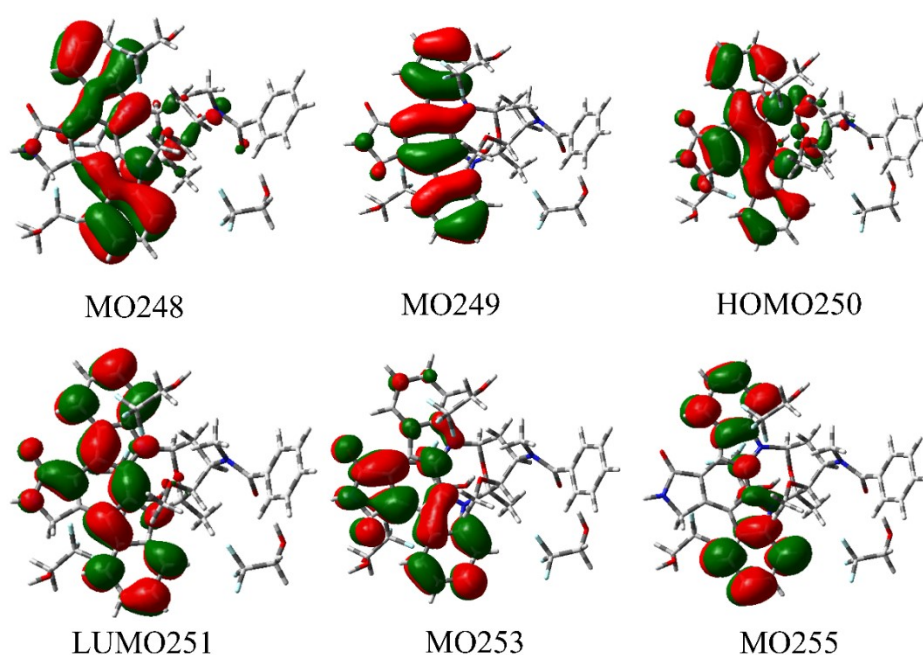

**Figure S7.** Molecular orbitals involved in the electronic transitions of midostaurin-TFE composition.

### 24. Elucidation of the origin of the Cotton effects (CEs) in the experimental ECD spectrum of midostaurin in ACN.

MO analysis for the midostaurin-ACN composition was also conducted at the TDDFT/CAM-B3LYP/cc-pVDZ level. We need to carefully analyze the orbitals (MOs) in the non-protonic solvent acetonitrile (ACN). The positive CE observed at 210 nm can be attributed to the  $\pi$ - $\pi^*$  electron transition of HOMO 194 $\rightarrow$ MO 199 (49.59%) from indolopyrrolocarbazole to the benzene ring in carbazole. The negative CE observed at 232 nm can be attributed to the  $\pi$ - $\pi^*$  electron transition from MO 193 to MO 199 (19.69%) in the benzene ring of indolopyrrolocarbazole to carbazole. The positive CE observed at 245 nm from the indolopyrrolocarbazole to pyrrolocarbazole has an n- $\pi^*$  electron transition of MO 193-MO 197 (58.41%). The negative CE observed at 262 nm can be attributed to the HOMO 194 to MO 197 (60.76%) ( $\pi$ - $\pi^*$ ) electron transition from the indolopyrrolocarbazole to pyrrolocarbazole,

accompanied by a small portion of  $n-\pi^*$  electron transitions. The positive CE observed at 293 nm can also be attributed to the  $\pi-\pi^*$  electron transition from indolopyrrolocarbazole to pyrrolocarbazole in MO 193-LUMO 195 (64.41%). The positive CE observed at 313 nm can be attributed to the  $\pi-\pi^*$  electron transition from indolopyrrolocarbazole to pyrrolocarbazole in HOMO 194-LUMO 195 (84.52%)

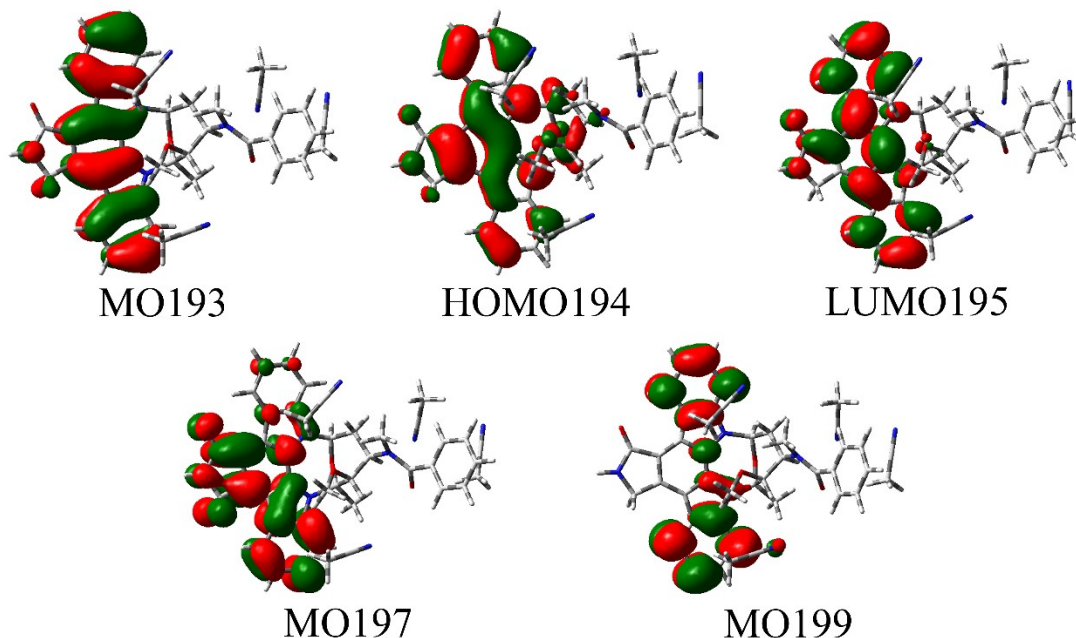

**Figure S8.** Molecular orbitals involved in the transitions of midostaurin-ACN composition.

## 25. Elucidation of the origin of the Cotton effects (CEs) in the experimental ECD spectrum of midostaurin in MeOH.

A comprehensive molecular orbital (MO) analysis for midostaurin-MeOH composition was conducted at the TDDFT/CAM-B3 LYP/cc-pVDZ level. The negative CE observed at 223nm in the experiment can be attributed to the  $n-\pi^*$  electron transition involving hom179→mo187 (35.05%) pyran ring to indolopyrrolocarbazole. the positive CE at 242nm can be attributed to the  $\pi-\pi^*$  electron transition from MO 185 to MO 191 (37.46%) from the indolopyrrolocarbazole to pyrrolocarbazole. The negative CE observed at 263nm originated from the  $n-\pi^*$  electron transition between the benzene ring and the indolopyrrolocarbazole electron, involving HUMO 183-LUMO 187 (67.44%). The experimental positive CE observed at 284nm is attributed to the  $\pi-\pi^*$  electron transition of MO 184-LUMO 187 (45.70%) and the  $\pi-\pi^*$  electron transition from indolopyrrolocarbazole to pyrrolidone. The negative CE observed at 304 nm is attributed to the  $\pi-\pi^*$  electron transition of HUMO 186 to MO188 (82.96%) from indolopyrrolocarbazole to the benzene ring. The positive CE observed at 320 nm can be attributed to the  $\pi-\pi^*$  electron transition from indolopyrrolocarbazole to pyrrolocarbazole (MO185 to LUMO 187, 55.00%).

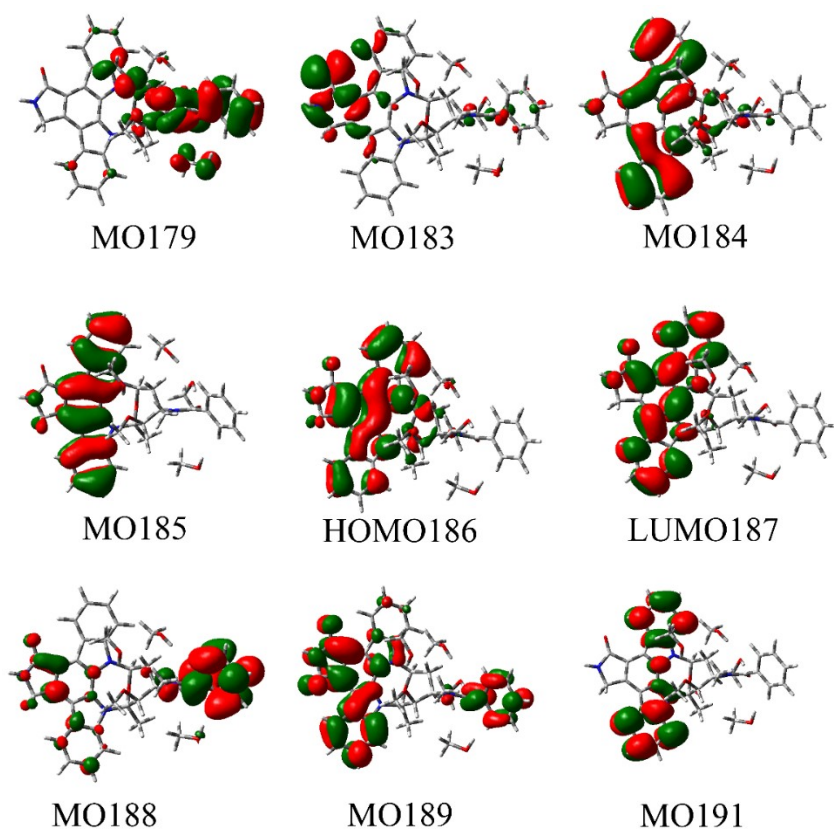

**Figure S9.** Molecular orbitals involved in the electronic transitions of midostaurin-MeOH cluster.

26. **Figure S10.**

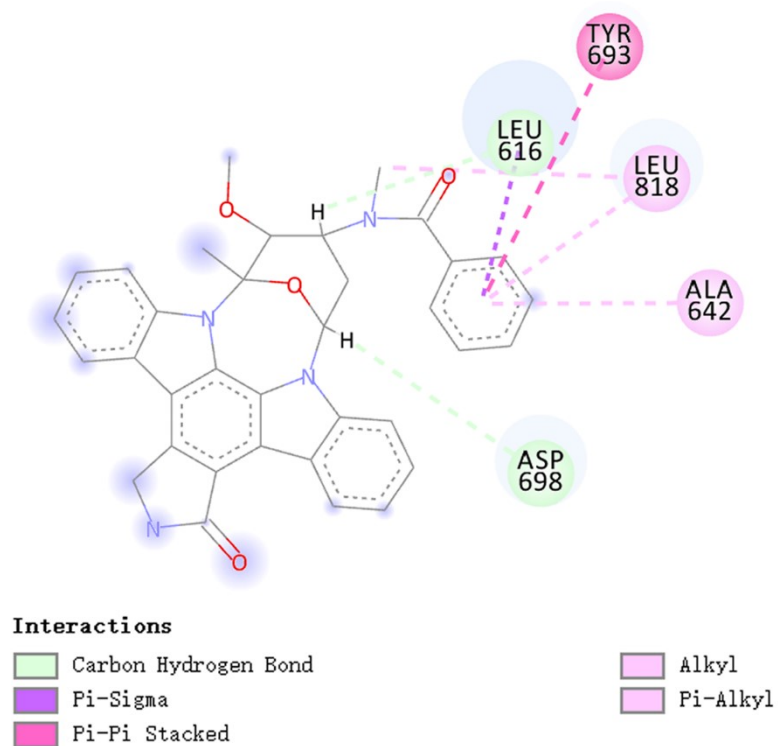

**Figure S10.** The two-dimensional molecular docking of midostaurin with the FIT3 protein in acute myeloid leukemia.

27. Figure S11.

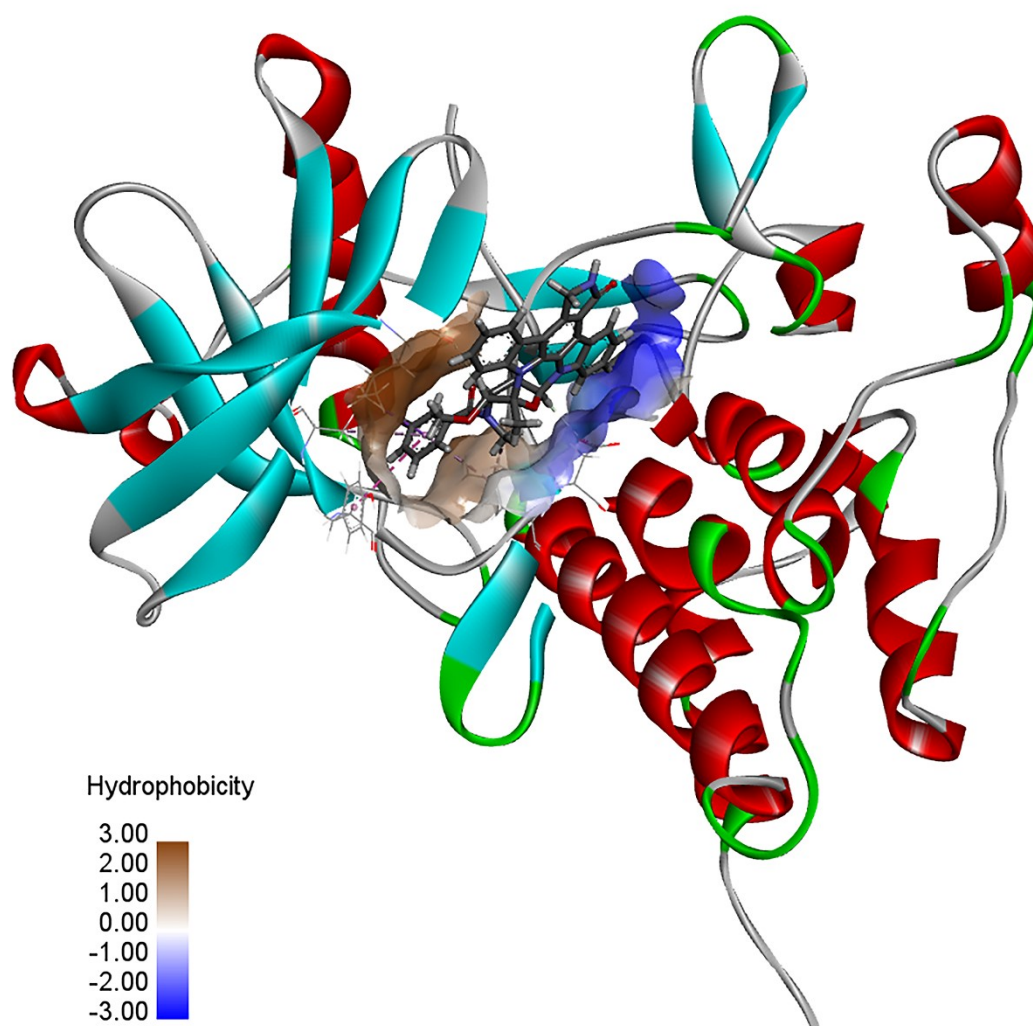

**Figure S11.** The three-dimensional molecular docking of midostaurin with the FIT3 protein in acute myeloid leukemia.

28. Figure S12.

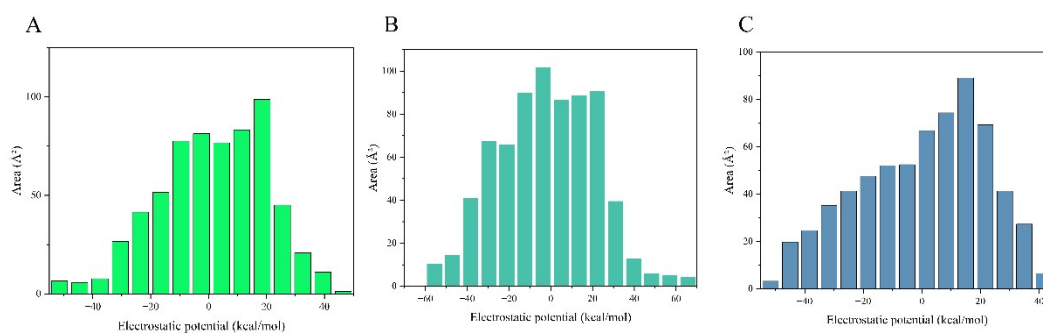

**Figure S12.** (A) Quantitative electrostatic potential distribution of TFE. (B) Quantitative electrostatic potential distribution of ME. (C) Quantitative electrostatic potential distribution of ACN.

**29. Table S14.** Comparison between the experimental ECD and the theoretical ECD and the similarity. The similarity analysis was conducted using the Specdis software. Under a relatively narrow bandwidth of 0.15 eV, the calculated spectra of the “solvation cluster” are more consistent with the experimental spectra.

| solvent | Comparison between the experimental ECD and the theoretical CD of a single molecule                                                                                      | Comparison between the experimental ECD and the theoretical CD of the “solvation cluster”                                                                                  |
|---------|--------------------------------------------------------------------------------------------------------------------------------------------------------------------------|----------------------------------------------------------------------------------------------------------------------------------------------------------------------------|
| TFE     | 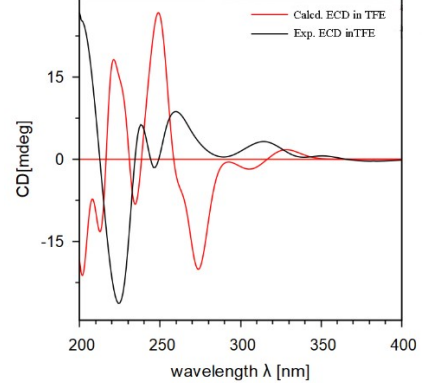 <p data-bbox="384 846 826 913">Similarity factor = 0.0647<br/>Bandwidth = 0.15</p>     |  <p data-bbox="858 846 1300 913">Similarity factor = 0.9140<br/>Bandwidth = 0.15</p>     |
| MeOH    |  <p data-bbox="384 1346 826 1413">Similarity factor = 0.0168<br/>Bandwidth = 0.15</p>  |  <p data-bbox="858 1346 1300 1413">Similarity factor = 0.9484<br/>Bandwidth = 0.15</p>  |
| ACN     |  <p data-bbox="384 1883 826 1951">Similarity factor = 0.8139<br/>Bandwidth = 0.15</p> |  <p data-bbox="858 1883 1300 1951">Similarity factor = 0.9423<br/>Bandwidth = 0.15</p> |

**30. Table S15.** Comparison between the experimental UV and the theoretical UV. Conduct the

The similarity analysis was conducted using the Speedis software. Under a relatively narrow bandwidth of 0.15 eV, the spectral profiles of the single molecule and cluster exhibit strong similarity.

| solvent | Comparison between the experimental UV and the theoretical UV of a single molecule                                                                                                                                                                             | Comparison between the experimental UV and the theoretical UV of the “solvation cluster”                                                                                                                                                                        |
|---------|----------------------------------------------------------------------------------------------------------------------------------------------------------------------------------------------------------------------------------------------------------------|-----------------------------------------------------------------------------------------------------------------------------------------------------------------------------------------------------------------------------------------------------------------|
| TFE     | 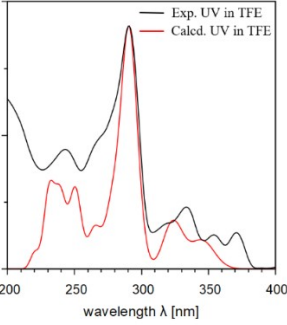 <p data-bbox="387 759 847 875">           Similarity factor = 0.8559<br/>           Bandwidth = 0.15<br/>           Scaling factor for calculated UV=0.9853         </p>     |  <p data-bbox="879 759 1342 875">           Similarity factor = 0.8527<br/>           Bandwidth = 0.15<br/>           Scaling factor for calculated UV=0.9833         </p>    |
| MeOH    |  <p data-bbox="387 1301 847 1417">           Similarity factor = 0.8804<br/>           Bandwidth = 0.15<br/>           Scaling factor for calculated UV=1.0125         </p>  |  <p data-bbox="879 1301 1342 1417">           Similarity factor=0.8727<br/>           Bandwidth= 0.15<br/>           Scaling factor for calculated UV=1.0125         </p>    |
| ACN     |  <p data-bbox="387 1800 847 1917">           Similarity factor = 0.8997<br/>           Bandwidth = 0.15<br/>           Scaling factor for calculated UV=1.0068         </p> |  <p data-bbox="879 1800 1342 1917">           Similarity factor =0.9027<br/>           Bandwidth = 0.15<br/>           Scaling factor for calculated UV=1.0068         </p> |

31. Figure S13.

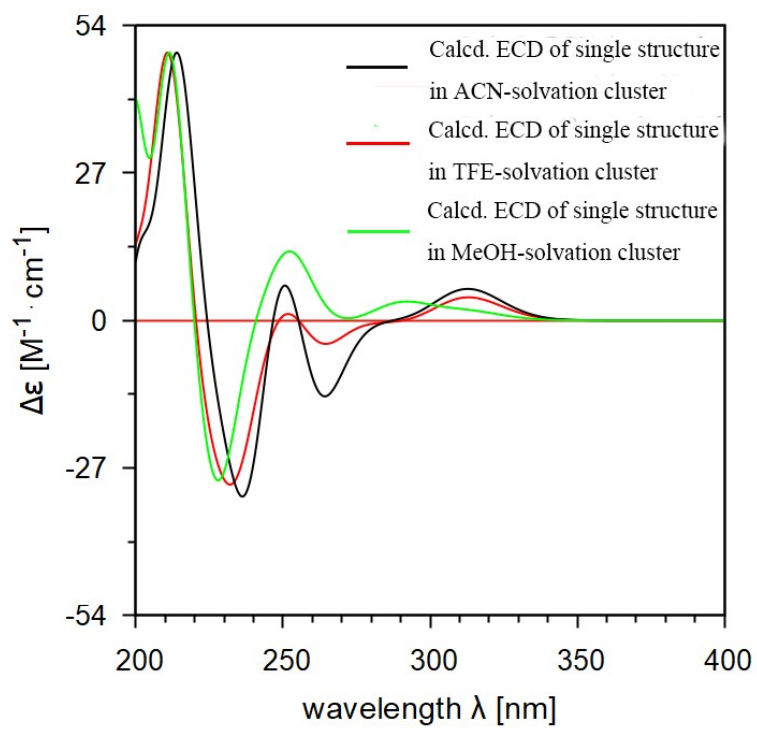

**Figure S13.** Recalculated ECD spectra for the single molecule in solvation clusters excluding solvent molecules.
